# Supplementary material for: DGraph Clusters Flaviviruses and β-Coronaviruses According to Their Hosts, Disease Type, and Human Cell Receptors
Source: PubMed Central journal article supplement — Bioinform Biol Insights. 2021 Jun 7;15:11779322211020316. doi: 10.1177/11779322211020316 (PMC8188974; doi:10.1177/11779322211020316), 2021-06-07
Supplement: sj-pdf-1-bbi-10.1177_11779322211020316.pdf [file sj-pdf-1-bbi-10.1177_11779322211020316.pdf]

Supplementary Material Braun et al. December 2020

Table S1 List of the 49 flaviviruses mapped by DGraph in Fig.1 and 2.

| ID | Flavi track ID  | Genbank      | Viral name                       | Length of Polyproteins |
|----|-----------------|--------------|----------------------------------|------------------------|
| 1  | >CFAX92USxXmX   | AIM49245     | Cell fusing agent virus (CFAV)   | 3341 aa                |
| 2  | >KRx99KExNmX_r  | NP_891560    | Kamiti River virus               | 3357 aa                |
| 3  | >CX_NC_008604   | YP_899469    | Culex flavivirus                 | 3362 aa                |
| 4  | >BSQx04USmXxX   | NC_009026    | Aroa virus                       | 3429 aa                |
| 5  | >IGUx04USmXxX   | NC_009026.2  | Aroa virus (Iguape)              | 3416 aa                |
| 6  | >KOKx04USmXxX   | AAV34157     | Kokobera virus                   | 3410 aa                |
| 7  | >ALFx66AUmXxX   | AAX82481     | Alfuy virus                      | 3434 aa                |
| 8  | >MVEe99AUmXxX   | NP_051124    | Murray Valley encephalitic virus | 3434 aa                |
| 9  | >JBEe82JPmNmX_r | NP_059434    | Japanese encephalitis virus      | 3432 aa                |
| 10 | >USUx01ATmNiX_r | YP_164264    | Usutu virus                      | 3434 aa                |
| 11 | >KUNx60AUmXmX   | AAP78942     | Kunjin virus                     | 3433 aa                |
| 12 | >WNe93DEmXxX_r  | NP_041724    | West Nile virus (WNV)            | 3430 aa                |
| 13 | >SLEe04USmXxX_r | YP_001008348 | Saint Louis encephalitis virus   | 3430 aa                |
| 14 | >ILHx04USmXxX   | YP_001040006 | Ilheus virus                     | 3424 aa                |
| 15 | >ROCx04USmXxX   | ATG32103     | Rocio virus                      | 3425 aa                |
| 16 | >BAGx04USmXxX   | AAV34161     | Bagaza virus                     | 3426 aa                |
| 17 | >KEDx04USmXxX   | AAV34156     | Kedougou virus                   | 3408 aa                |
| 18 | >ZIKAx04USmXxX  | YP_002790881 | Zika virus                       | 3419 aa                |
| 19 | >DV1v74AUmNxX_r | NP_059433    | Dengue virus 1                   | 3392 aa                |
| 20 | >DV3x56PHmXxX_r | YP_001621843 | Dengue virus 3                   | 3390 aa                |
| 21 | >DV2v88USmXxX_r | NP_056776    | Dengue virus 2                   | 3391 aa                |
| 22 | >DV4v00USmXxX_r | NP_073286    | Dengue virus 4                   | 3387 aa                |
| 23 | >ENTx06UGxXrX   | AKP24039     | Entebbe bat virus                | 3411 aa                |
| 24 | >YOKx71JPxNbX_r | NP_872627    | Yokose virus                     | 3425 aa                |
| 25 | >SEPx06PGxXrX   | YP_950478    | Sepik virus                      | 3405 aa                |
| 26 | >YFx27GHmXhX    | NP_041726    | Yellow fever virus               | 3411 aa                |
| 27 | >AHFh95SAthX_r  | AFV78154     | Alkhumra hemorrhagic fever virus | 3416 aa                |
| 28 | >KFDx03FRtXxX   | YP_009513189 | Kyasanur Forest disease virus    | 3416 aa                |
| 29 | >GGE_DQ235153   | ABB90677     | Greek goat encephalitis virus    | 3414 aa                |
| 30 | >TSE_DQ235151   | ABB90675     | Turkish sheep encephalitic virus | 3414 aa                |

|    |                 |              |                                  |         |
|----|-----------------|--------------|----------------------------------|---------|
| 31 | >Llx96GBtNtX_r  | AYG86395     | Louping ill virus                | 3414 aa |
| 33 | >SSE_DQ235152   | ABB90676     | Spanish sheep encephalitis virus | 3414 aa |
| 33 | >TBEe95ATtXrX   | NP_043135    | Tick-borne encephalitis virus    | 3414 aa |
| 34 | OMSKh02UStNtX   | NP_878909    | Omsk hemorrhagic fever virus     | 3414 aa |
| 35 | >LGTx56MYtXtX_r | NP_620108    | Langat virus                     | 3414 aa |
| 36 | >DTx95CTAtXxX   | AAL32169     | Deer tick virus                  | 3415 aa |
| 37 | >POWx58CAtXxX_r | NP_620099    | Powassan virus                   | 3415 aa |
| 38 | >GGY_DQ235145   | YP_009345034 | Gadgets Gully virus              | 3416 aa |
| 39 | >KSIx04UZtXxX_r | ABE73208     | Karshi virus                     | 3416 aa |
| 40 | >RF_DQ235149    | ABB90673     | Royal Farm virus                 | 3417 aa |
| 41 | >KAD_DQ235146   | ABB90670     | Kadam virus                      | 3404 aa |
| 42 | >MEA_DQ235144   | ABB90668     | Meaban virus                     | 3421 aa |
| 43 | >SRE_DQ235150   | ABB90674     | Saumarez Reef virus              | 3422 aa |
| 44 | >TYU_DQ235148   | ABB90672     | Tyuleniy virus                   | 3422 aa |
| 45 | >MMLe58USxNbX   | NP_689391    | Montana myotis leukoenc. virus   | 3374 aa |
| 46 | >RBx99FRxXxX_r  | NP_620044    | Rio Bravo virus                  | 3379 aa |
| 47 | >MODx58USxNrX   | NP_619758    | Modoc virus                      | 3374 aa |
| 48 | >APOIX99FRxNrX  | NP_620045    | Apoi virus                       | 3371 aa |
| 49 | >TABx73TTxXbX   | NP_658908    | Tamana bat virus                 | 3350 aa |

**Table S2: Enterovirus (EV) sequence fragments, used for Figure 1 i-g and Figure 3,** listed according to their number in the plots. The fragments include the VPg (viral protein linked to the genome, “3B”, underlined (1) ) and amino acids of the following area from “3C”. VPg is cleaved from the 3rd protein fragment between the terminal Q and G residues marked by /. The sequences, selected for their diversity (2, 3), were not aligned before uploading to DGRAPH. Abbreviations: CVA, CVB: coxsackie virus A or B; HPV: human poliovirus; AFP: acute flaccid paralysis; CNS: central nervous system infection.

| # | Strain  | Sequence                                                           | Characteristics/Disease Phenotype                                                         |
|---|---------|--------------------------------------------------------------------|-------------------------------------------------------------------------------------------|
| 1 | SimN125 | GAYTGLPFTKPKVPTIRQAKVQ/GPNFEFAV<br>AMMKRNSCI AKTGQGEFTMLGIWDKWAVLP | Simian                                                                                    |
| 2 | EV103   | GAYTGLPFNPKVPTIRQAKVQ/GPSFEFAV<br>AMMKRNSAIIKTGQ/GEFTMLGVWDKWAVVP  | Primate (with distinct differences to previously known chimpanzee and monkey viruses; (4) |
| 3 | CVA20   | GAYTGLPNKKPNIPTIRTAQVQ/GPGFDYAV<br>AMAKRNIVTATTSKGEFTMLGVHDNVAVLP  | Common cold, infant diarrhea                                                              |
| 4 | CVA24   | GAYTGLPNKKPNVPTIRTAQVQ/GPGFDYAV<br>AMAKRNILTATTSKGEFTMLGVHDNVAI LP | “                                                                                         |
| 5 | CVA11   | GAYTGLPNKRPNVPTIRTAQVQ/GPGFDYAV<br>AMAKRNIVTATTSKGEFTMLGVHDNVAVLP  | “                                                                                         |
| 6 | SV6     | GAYTGLPFNPKVPTIRQAKVQ/GPSFEFAV<br>AMMKRNSAIIKTGQ/GEFTMLGIWDKWAVVP  | Simian                                                                                    |

|    |                |                                                                   |                                                                                              |
|----|----------------|-------------------------------------------------------------------|----------------------------------------------------------------------------------------------|
| 7  | HEV102         | GAYTGLPNKKPNVPTIRTAQVQ/GPGFDYAV<br>AMAKRNIVTATTSKGEFTMLGVHDNAVLP  | Isolate similar to CVA20 strains<br>(5);                                                     |
| 8  | CVA15          | GAYTGLPNKRPNVPTIRTAQVQ/GPGFDYAV<br>AMAKRNILTATTSKGEFTMLGVHDNAVILP | Common cold, infant diarrhea                                                                 |
| 9  | CVA13          | GAYTGLPNKKPNVPTIRTAQVQ/GPGFDYAV<br>AMAKRNIVTATTSKGEFTMLGVHDNAVLP  | Common cold, infant diarrhea                                                                 |
| 10 | HEV87          | GAYTGLPNQPKVPTLRQAKVQ/GPAFEFAV<br>AMMKRNASTAKTEYGEFTMLGIYDRWAVLP  | AFP (6);                                                                                     |
| 11 | HPV2           | GAYTGLPNKKPNVPTIRTAQVQ/GPGFDYAV<br>AMAKRNIVTATTSKGEFTMLGVHDNAVILP | Poliomyelitis Serotype 2                                                                     |
| 12 | HPV3           | GAYTGLPNKKPNVPTIRTAQVQ/GPGFDYAV<br>AMAKRNIVTATTSKGEFTMLGVHDNAVILP | Poliomyelitis Serotype 3                                                                     |
| 13 | PV1<br>Mahoney | GAYTGLPNKKPNVPTIRTAQVQ/GPGFDYAV<br>AMAKRNIVTATTSKGEFTMLGVHDNAVILP | Poliomyelitis Serotype 1                                                                     |
| 14 | CVA18          | GPYTGLPSKKPNIPTIRTAQVQ/GPGFDYAV<br>AMAKRNIVTATTSKGEFTMLGVHDNAVLP  | Oncolytic; isolated from throat<br>swabs of soldiers displaying no<br>detectable illness (7) |
| 15 | HEV99          | GPYTGLPTRKPNVPTIRTAQVQ/GPGFDYAV<br>AMAKRNILTATTTKGEFTMLGVHDNAVLP  | AFP and other                                                                                |
| 16 | CVA17          | GAYTGLPNKKPNIPTIRTAQVQ/GPGFDYAV<br>AMAKRNIVTATTSKGEFTMLGVHDNAVLP  | Common cold, infant diarrhea                                                                 |
| 17 | SimPic18       | GAYSGMPQTKPKVPTIRQAKVQ/GPNFEFAV<br>AMMKRNSAIIKTGQGEFTMLGVWDKWAVVP | Simian                                                                                       |
| 18 | HEV75          | GAYTGMPNQPKVPTLRQAKVQ/GPAFEFAV<br>AMMKRNASTVKTEYGEFTMLGIYDRWAVLP  | CNS, AFP (8)                                                                                 |
| 19 | EV6            | GAYTGMPNQPKVPTLRQARVQ/GPAFEFAV<br>AMMKRNSSTVKTEYGEFTMLGIYDRWAVLP  | Meningitis, encephalitis,<br>pleurodynia, exanthema                                          |
| 20 | CVA21          | GAYTGLPSKKPNVPTIRIAQVQ/GPGFDYAV<br>AMAKRNIVTATTNKGEFTMLGVHDNAVLP  | Common cold, infant diarrhea                                                                 |
| 21 | CVB3W          | GAYTGINQPKVPTLRQAKVQ/GPAFEFAV<br>AMMKRNSSTVKTEYGEFTMLGIYDRWAVLP   | CVB3, Woodruff strain,<br>myocardiotropic                                                    |
| 22 | HEVB           | GAYTGLPNQPKVPTLRQAKVQ/GPAFEFAV<br>AMMKRNASTVKTEYGEFTMLGIYDRWAVLP  | Enterovirus B, see EV87, EV100                                                               |
| 23 | EC05N          | GAYTGMPNQPKVPTLRQAKVQ/GPAFEFAV<br>AMMKRNSSTVKTEYGEFTMLGIYDRWAVLP  | Fever, rash, aseptic meningitis<br>(sporadic) (9)                                            |
| 24 | EV100          | GAYTGLPNQPKVPTLRQAKVQ/GPAFEFAV<br>AMMKRNASTVKTEYGEFTMLGIYDRWAVLP  | EVB; see also HEV87                                                                          |
| 25 | EV4            | GAYTGMPNQPKVPTLRQAKVQ/GPAFEFAV<br>AMMKRNSSTVKTEYGEFTMLGIYDRWAVLP  | Meningitis, encephalitis,<br>pleurodynia, exanthema                                          |
| 26 | EV96           | GAYTGLPSKKPNVPTIRTAQVQ/GPGFDYAV<br>AMAKRNILTATTSKGEFTMLGVHDNAVILP | Hand foot and mouth disease (10) ;                                                           |
| 27 | EV3            | GAYTGMPNQPKVPTLRQAKVQ/GPAFEFAV<br>AMMKRNSSTVKTEYGEFTMLGIYDRWAVLP  | Meningitis, encephalitis,<br>pleurodynia, exanthema                                          |
| 28 | EV11           | GAYTGMPNQPKVPTLRQAKVQ/GPAFEFAV<br>AMMKRNASTVKTEYGEFTMLGIYDRWAVLP  | Meningitis, encephalitis,<br>pleurodynia, exanthema                                          |
| 29 | EV7            | GAYTGLPNQPKVPTLRQAKVQ/GPAFEFAV<br>AMMKRNSSTVKTEYGEFTMLGIYDRWAVLP  | Meningitis, encephalitis,<br>pleurodynia, exanthema                                          |
| 30 | CVB1           | GAYTGMPNQPKVPTLRQAKVQ/GPVFEFAV<br>AMMKRNSSTVKTEYGEFTMLGIYDRWAVLP  | Myocarditis, encephalitis,<br>pleurodynia, exanthema                                         |
| 31 | CVB6           | GAYTGMPNQPKVPTLRQAKVQ/GPAFEFAV<br>AMMKRNSSTVKTEYGEFTMLGVYDRWAVLP  | Myocarditis, encephalitis,<br>pleurodynia, exanthema                                         |
| 32 | EV30           | GAYSGMPNQKSKVPTLRQAKVQ/GPAFEFAV<br>AMMKRNASTVKTEYGEFTMLGIYDRWAVLP | Meningitis, encephalitis,<br>pleurodynia, exanthema                                          |

|    |       |                                                                   |                                                          |
|----|-------|-------------------------------------------------------------------|----------------------------------------------------------|
| 33 | CVA22 | GAYTGLPNAKPKVPTIRAAKVQ/GPVFDYAV<br>AMAKKNILTATTEKGEFTMLGVYDRVAVLP | Gastroenteritis; herpangina;<br>aseptic meningitis (11); |
|----|-------|-------------------------------------------------------------------|----------------------------------------------------------|

**Fig. S1: PD graph of the E domain 3 of sequences representing WNV, the four DENV serotypes, and Zika virus.** The 7P8 sequence is a PCP-consensus derived from DENV strains that represents all four serotypes of DENV. Note that Zika has only slightly higher identity to WNV than it does to the DENV consensus.

Input file: Testfile7P8withFVstrains.txt

"Islands" Removed by 14.0 distance threshold:

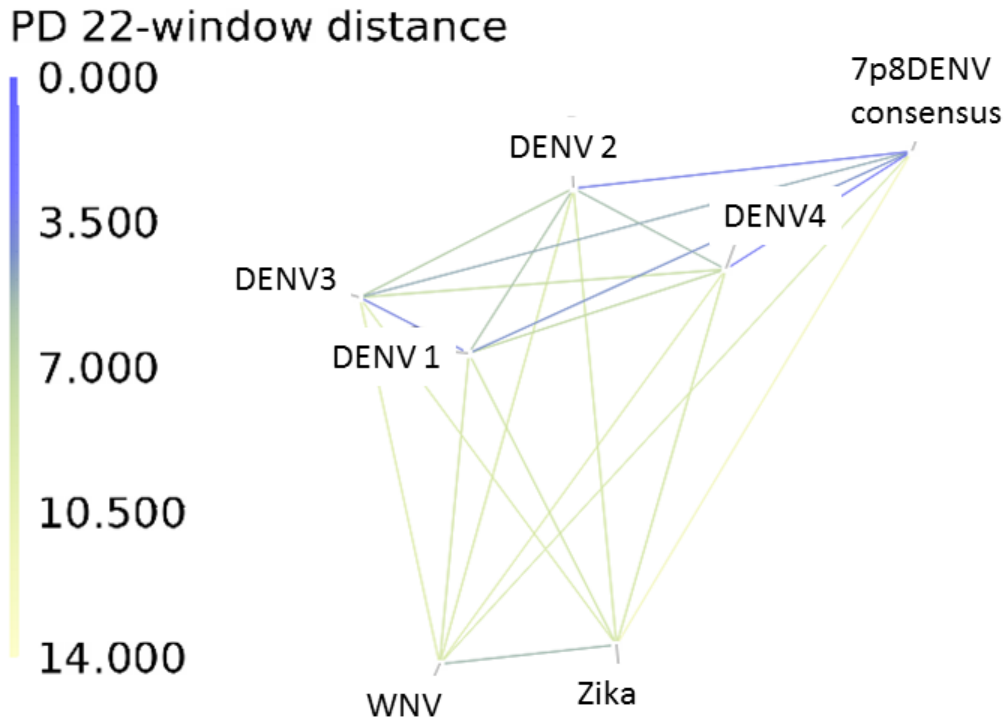

**Figure S2: Enterovirus plot with numbering according to Table S2.** Nodes in the left cluster are 10,18,19,21-25,27-32, those in the right cluster are 3-5,7-9,11-16,20. The four simian viruses (1,2,6,17) cluster at the bottom while 33 is an outlier.

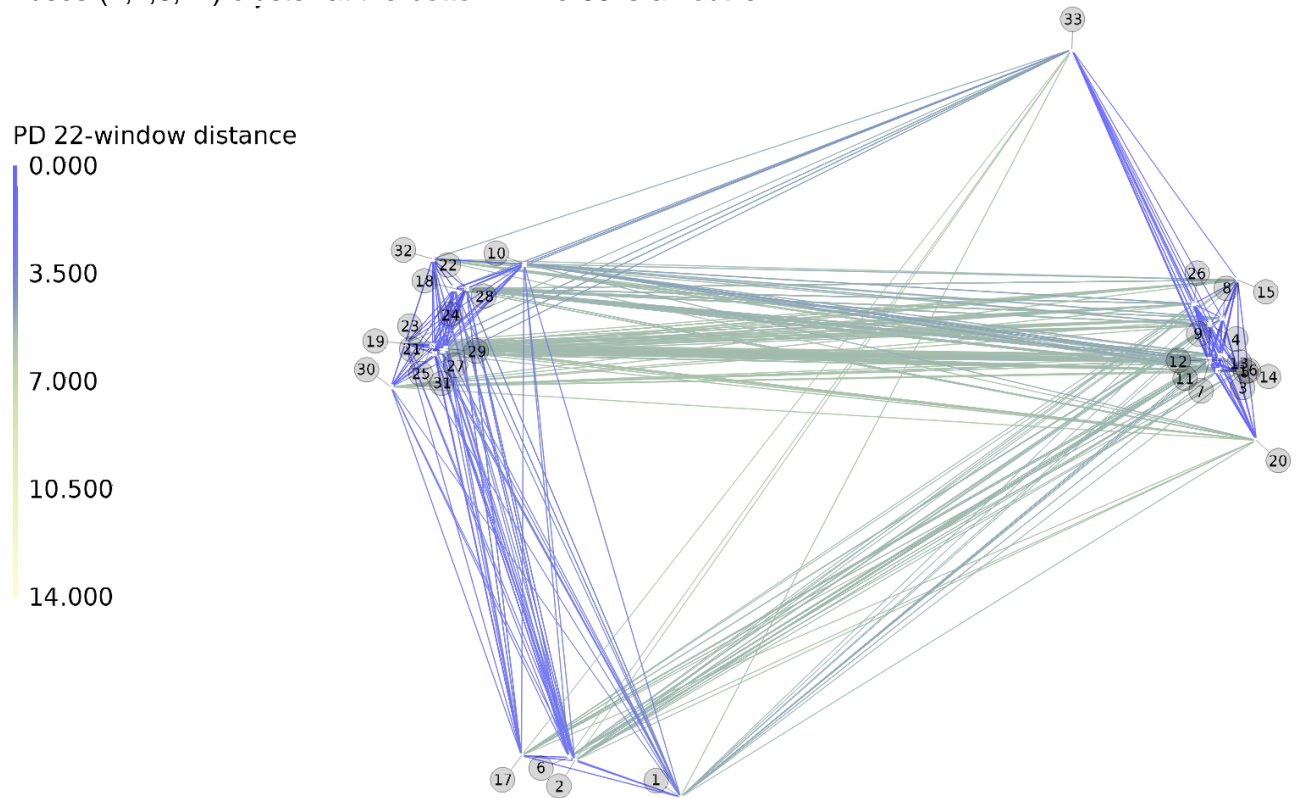

**Using the program:** First time users should follow directions in the “read me” file. Input files should be ASCII text files. The headers of each FASTA sequence file can directly be displayed on the resulting graph by pushing “y” to stop the program and “b” to show sequence headers.

The input files for the figures in this paper can be obtained from the GitHub website.

To open the program, click on the executable .jar file. The program will automatically open and supply a list of subroutines for formatting or inputting data. In default mode, where the user supplies a list of sequences in FASTA format, the program will automatically open the selected text file, calculate the inter-sequence PD values as described below, and begin the simulation to determine the best 2D-presentation of the data. For very diverse data, it is recommended that

the user scale the viewing field by pushing 9 to zoom out (this may require pushing 9 several times to get the data into view). After the viewing field is established, the points can be rescattered by pushing 'e', at which point the simulation will start again. The user can stop the simulation or restart it at any time by pushing 'y'. Once the user is satisfied with the graph, it can be saved as a .pdf and .png file by typing s.

## References

- 1 Schein CH, Oezguen N, van der Heden van Noort GJ, et al. NMR solution structure of poliovirus uridylyated peptide linked to the genome (VPgpU). *Peptides*. 2010 Aug;**31**(8):1441-8.
- 2 Schein CH, Ye M, Paul AV, et al. Sequence specificity for uridylylation of the viral peptide linked to the genome (VPg) of enteroviruses. *Virology*. 2015 Oct;**484**:80-5.
- 3 Schein CH, Rowold D, Choi KH. Allosteric inhibitors of Coxsackie virus A24 RNA polymerase. *Bioorganic & medicinal chemistry*. 2016 Feb 15;**24**(4):570-7.
- 4 Nix WA, Jiang B, Maher K, Strobert E, Oberste MS. Identification of enteroviruses in naturally infected captive primates. *Journal of clinical microbiology*. 2008 Sep;**46**(9):2874-8.
- 5 Brown BA, Maher K, Flemister MR, et al. Resolving ambiguities in genetic typing of human enterovirus species C clinical isolates and identification of enterovirus 96, 99 and 102. *The Journal of general virology*. 2009 Jul;**90**(Pt 7):1713-23.
- 6 Tao Z, Cui N, Xu A, et al. Complete genome sequence of enterovirus 87 isolated from a child with acute flaccid paralysis in China in 2000. *Virus genes*. 2013 Aug;**47**(1):156-9.
- 7 Au GG, Beagley LG, Haley ES, Barry RD, Shafren DR. Oncolysis of malignant human melanoma tumors by Coxsackieviruses A13, A15 and A18. *Virology journal*. 2011 Jan 18;**8**:22.
- 8 Oberste MS, Michele SM, Maher K, et al. Molecular identification and characterization of two proposed new enterovirus serotypes, EV74 and EV75. *The Journal of general virology*. 2004 Nov;**85**(Pt 11):3205-12.
- 9 Israelsson S, Gullberg M, Jonsson N, Roivainen M, Edman K, Lindberg AM. Studies of Echovirus 5 interactions with the cell surface: heparan sulfate mediates attachment to the host cell. *Virus research*. 2010 Aug;**151**(2):170-6.
- 10 Xu Y, Sun Y, Ma J, et al. A novel Enterovirus 96 circulating in China causes hand, foot, and mouth disease. *Virus genes*. 2017 Jun;**53**(3):352-6.
- 11 Tokarz R, Haq S, Sameroff S, Howie SRC, Lipkin WI. Genomic analysis of coxsackieviruses A1, A19, A22, enteroviruses 113 and 104: viruses representing two clades with distinct tropism within enterovirus C. *The Journal of general virology*. 2013 Sep;**94**(Pt 9):1995-2004.
